# Supplementary material
Source: publisher figshare collection journal article supplement (https://future-science-group.figshare.com/ndownloader/files/34674391)
Supplement: Supplementary file 1 [file 34674391]

Supplementary Table S1. Clinical Trial Registration Number of the original studies

| Trial name | Clinical Trial Registration Number of the original studies |
| --- | --- |
| CheckMate 017 | NCT01642004 |
| CheckMate 026 | NCT02041533 |
| CheckMate 057 | NCT01673867 |
| CheckMate 078 | NCT02613507 |
| Impower 110 | NCT02409342 |
| IMpower 130 | NCT02367781 |
| IMpower 131 | NCT02367794 |
| Impower 132 | NCT02657434 |
| JAVELIN Lung 200 | NCT02395172 |
| KEYNOTE 010 | NCT01905657 |
| KEYNOTE 024 | NCT02142738 |
| KEYNOTE 033 | NCT02864394 |
| KEYNOTE 042 | NCT02220894 |
| KEYNOTE 189 | NCT02578680 |
| KEYNOTE 407 | NCT02775435 |
| MYSTIC | NCT02453282 |
| OAK | NCT02008227 |
| ORIENT-12 | NCT03629925 |
